# Supplementary material for: Overexpression of OsERF83, a Vascular Tissue-Specific Transcription Factor Gene, Confers Drought Tolerance in Rice
Source: MDPI journal article supplement (doi:10.3390/ijms22147656), 2021-07-17
Supplement: s1 [file s1]

## Supplementary Materials

Overexpression of OsERF83, a vascular tissue-specific transcription factor gene, confers drought tolerance in rice

### (a) Subcellular localization analysis construct

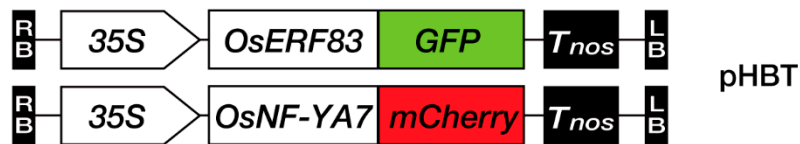

### (b) Overexpression construct *OsERF83<sup>OX</sup>*

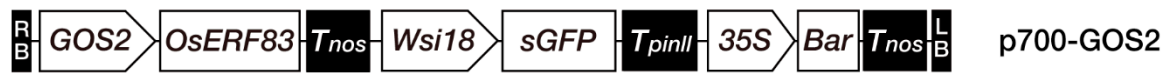

### (c) CRISPER/rCas9 construct *OsERF83<sup>KO</sup>*

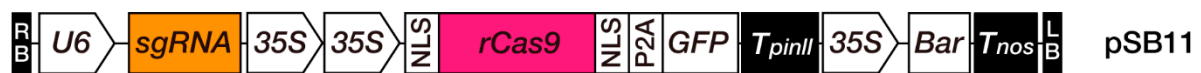

### (d) Histochemical GUS analysis construct

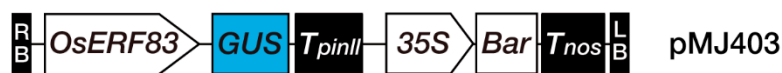

### (e) ChIP analysis construct *OsERF83-cMYC<sup>OX</sup>*

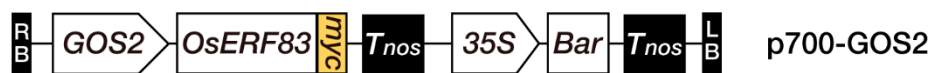

**Figure S1.** Schematic diagram of the vector constructs used in this study. *GOS2*, promoter of rice *eukaryotic translation initiation factor 1-like gene* (Os07g0529800); *Tnos*, the 3' region of nopaline synthase gene; *TpinII*, the 3' region of the potato (*Solanum tuberosum*) proteinase inhibitor II gene; 35S, 35S promoter of Cauliflower mosaic virus; *Bar*, the bacterial phosphinothricin acetyltransferase gene; *Wsi18*, promoter of a *stress-inducible gene*; LB, left border; RB, right border; T, terminator.

(a)

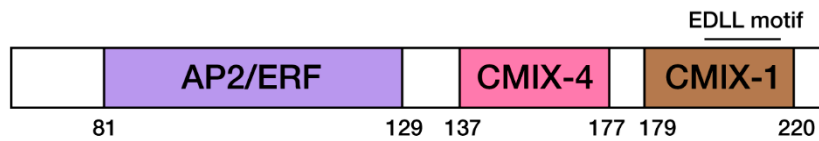

(b)

1 ATGCATTGCTGCATGTCGCTTCATCCTCACCGCCGCCACGGCGACGGCGACGTCGACGGATCAGCATCAGGA  
1 M H C C M S L H P H R R H G D G D V D G S A S G

73 TCAGGATCAGCGCGCCTCACCGCCGGCCTCATCAACTTCCTCGAATCGCGTCGCGCCGGCGCCATGAGCACC  
25 S G S A R L T A G L I N F L E S R R A G A M S T

142 ACCAACAGCTCATCCTCTGTCTGTCTGTCCTCAGCCATGGACGCCCATGGACAGGAGGAGGAGGAGGAGCCGATG  
49 T N S S S S V S V P A M D A H G Q E E E E E P M

211 CAGGTGCAGCAACAGCAGGCGTTCCGCGGGGTGCGCAAGCGGCCATGGGGCAAGTTTGCGGCGGAGATC  
73 Q V Q Q Q Q A F R G V R K R P W G K F A A E I  
AP2/ERF domain

280 CGCGACTCGACGCGCAACGGCGTGCGCGTGTGGCTGGGCACGTTGACAGCGCGGAGGAGGCGGCGCTG  
96 R D S T R N G V R V W L G T F D S A E E A A L

355 GCCTACGACCAGGCGGCGTTCGCCATGCGCGGGTCCGCGGCGGTGCTCAACTTCCCATGGAGCAGGTG  
119 A Y D Q A A F A M R G S A A V L N F P M E Q V

423 AGGCGTTCATGGACATGTCCCTCCTGCAGGAAGGGGCGTCGCCGGTGGTGGCGCTGAAGCGGCGGCAC  
142 R R S M D M S L L Q E G A S P V V A L K R R H  
CMIX-4

492 TCCATGCGAGCGGCGAGCAGCGGGGCGGCGGCGCAAGAGCGCTGCACCTGCACCGGCGGATCAGGAAGGC  
165 S M R A A A A G R R R K S A A P A P A D Q E G  
CMIX-1

561 GGAGGAGGGGTGATGGAGCTGGAGGACCTGGGACCTGACTACCTGGAGGAGCTGCTAGCCGCCTCTCAGCCO  
188 G G G V M E L E D L G P D Y L E E L L A A S Q P  
EDLL motif

633 ATCGATATCACCTGCTGCACAAGCCCAAGCCACCACTCCATCTGA  
222 I D I T C C T S P S H H S I \*

**Figure S2.** The structure of domains and motifs of *OsERF83*. (A) A schematic representation of domains and motif based on (Nakano *et al.*, 2006) is shown. The box indicates the CDS of *OsERF83*. The functional domains are colored and the motif is represented as a bar. (B) The amino acid and nucleotide sequences of the *OsERF83* are aligned. Gray small circle-shaped box indicates the set of the codon. The purple box indicates AP2/ERF domain, Pink and

brown boxes represent CMIX-4, -1 domain, respectively. EDLL motif is indicated in CMIX-1 domain at the end of C-terminal.

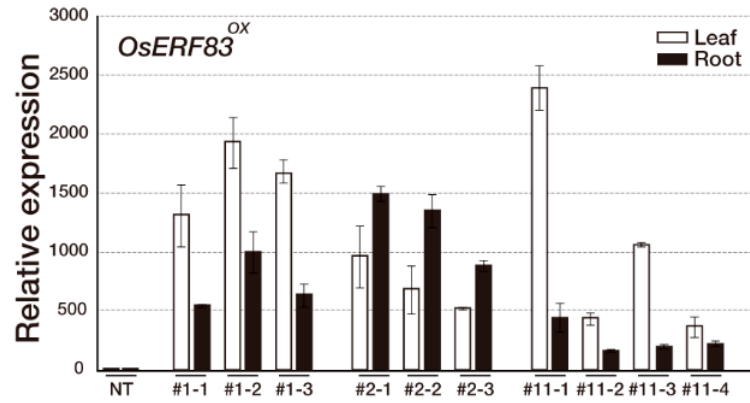

**Figure S3.** Relative expression levels of *OsERF83* in non-transgenic (NT) and three independent *OsERF83* overexpressed (*OsERF83<sup>OX</sup>*) transgenic rice plants. Total RNAs extracted from leaves and roots of each sister line. *OsUbi1* was used as the internal control for normalization. Data represent mean value  $\pm$  *SD* (n=3).

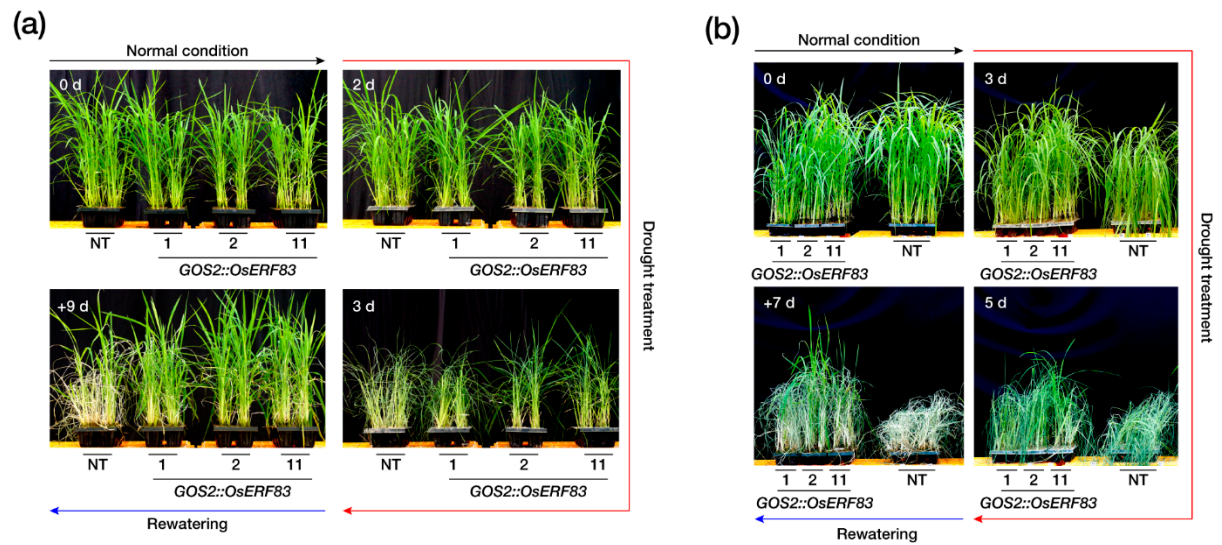

**Figure S4.** Phenotypes of the T3 (left panel), and T4 (right panel) generations of *OsERF83<sup>OX</sup>* transgenic rice and NT plants under drought treatments.

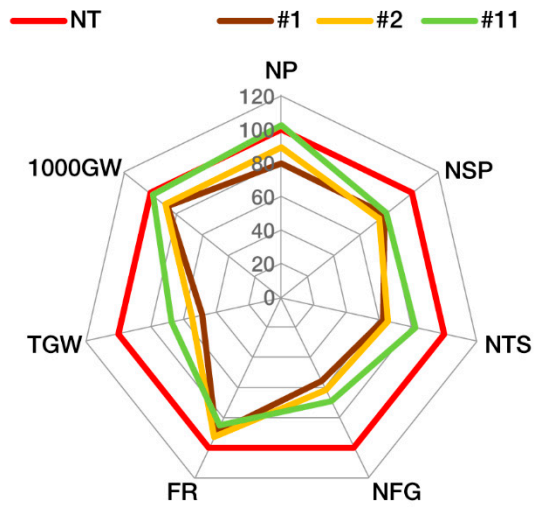

**Figure S5.** Agronomic traits of three independent T4 homozygous *OsERF83<sup>OX</sup>* transgenic rice (lines 1, 2, 11) compared with NT in the paddy field (2020). Each data point represents the percentage of the mean values (n=18) listed in Table S2. Mean values from NT plants were assigned a reference value of 100%. NP, number of panicles per hill; NSP, number of spikelets per panicle; NTS, number of total spikelets; NFG, number of filled grains; FR, filling rate; TGW. Total grain weight; 1000 GW, 1000 grain weight.

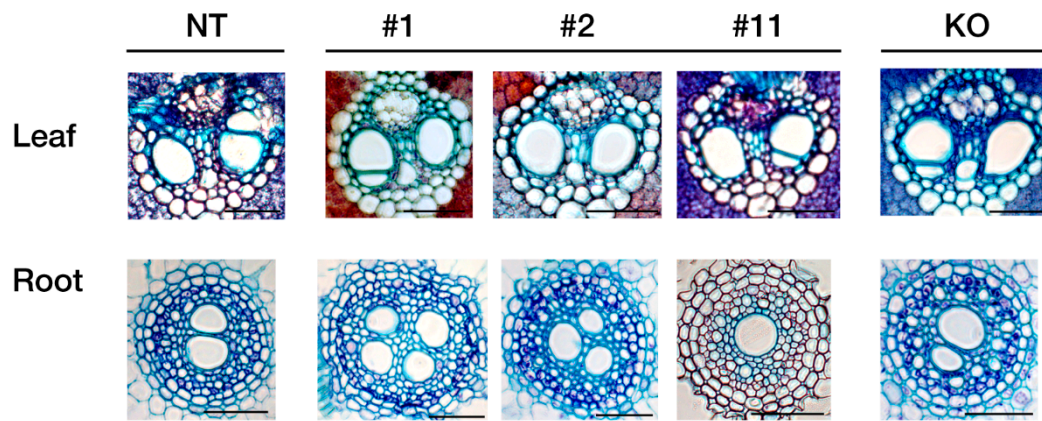

scale bar: 50μm

**Figure S6.** Cross-section images showing 2-month old mature leaves (upper panels) and roots (bottom panels) of NT, *OsERF83<sup>OX</sup>* transgenic rice, and knock-out (*OsERF83<sup>KO</sup>*) mutants. Scale bar represents 50μm

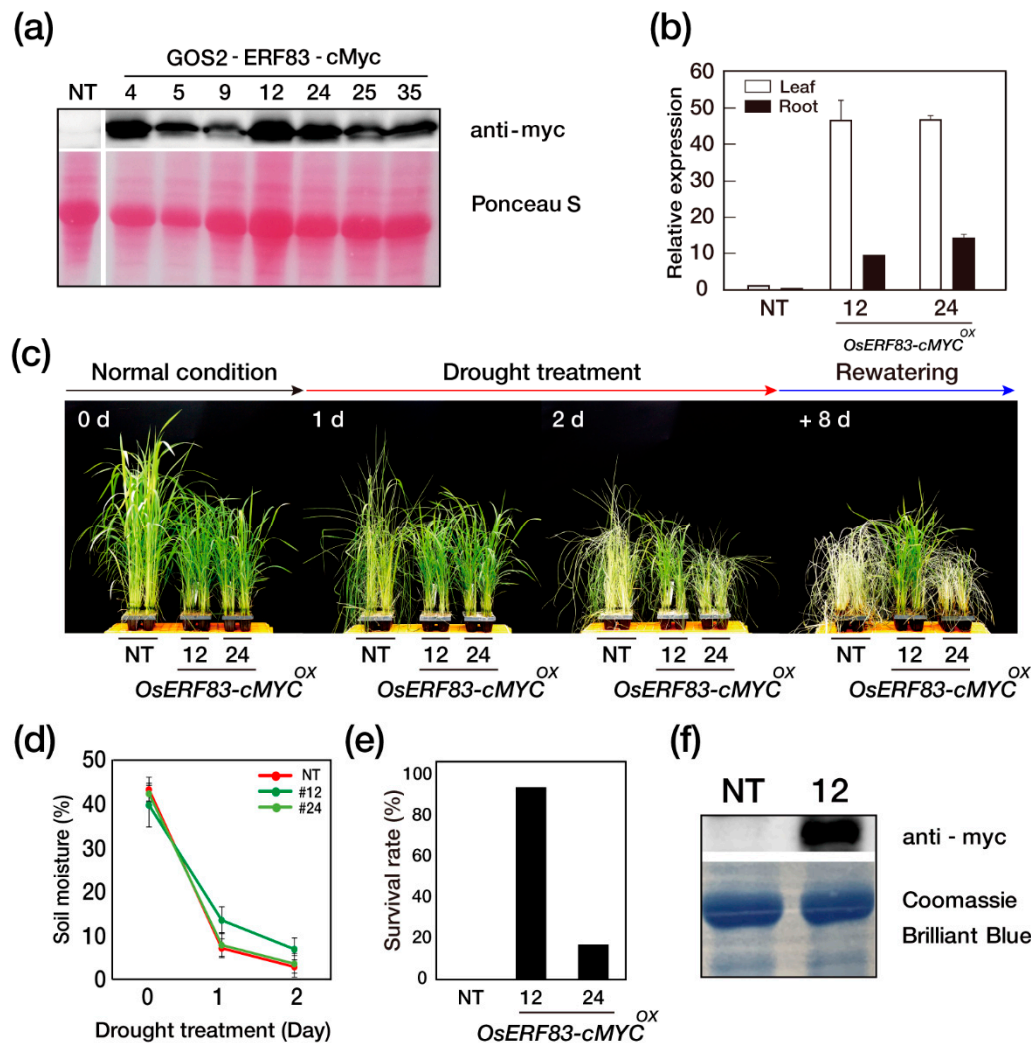

**Figure S7.** The protein expression of *OsERF83* overexpression myc tagging transgenic (*OsERF83-MYC<sup>OX</sup>*) and the phenotype under drought treatment. (a) Western blot analysis of *OsERF83-MYC<sup>OX</sup>* (lines 4, 5, 9, 12, 24, 25, 35) plants leaves with anti-myc antibody. The upper panel showed *OsERF83-myc* recombinant proteins in blot and the lower panel showed Ponceau S staining as a loading control of each line. (b) Relative expression levels of *OsERF83-MYC<sup>OX</sup>* (lines 12, 24). *OsUbi1* (*Ubiquitin1*; Os06g0681400) was used as the internal control for normalization. Data represent mean value + SD ( $n=3$ ) (c) Drought tolerance phenotypes of *OsERF83-MYC<sup>OX</sup>* (lines 12, 24) transgenic plants. All plants were grown in soil 5 weeks under a well-watered condition and exposed to drought stress for 2 days, followed by re-watering for 8 days in the greenhouse. (d) Measurement of soil moisture



contents (%). Data represent mean value  $\pm$  SD of 15 measurements performed at different pots. (e) The survival rate of *OsERF83-MYC<sup>OX</sup>* (lines 12, 24) transgenic plants scored 8 days after re-watering. (f) Western blot analysis of *OsERF83-MYC<sup>OX</sup>* (lines 12, 24) plants from (c) leaves with anti-myc antibody.



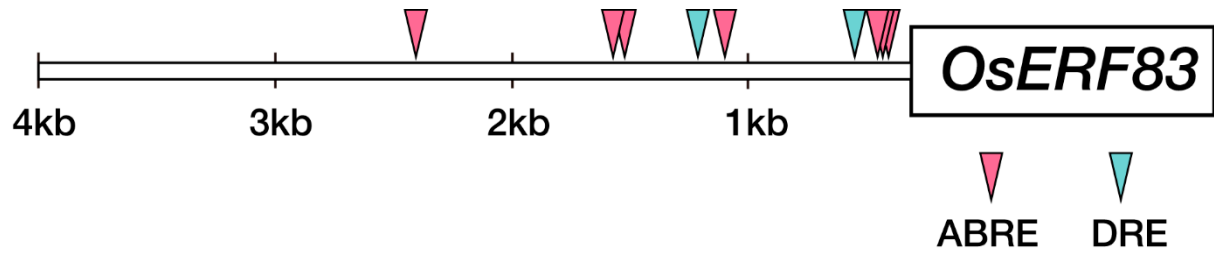

**Figure S9.** Cis-elements of a promoter in *OsERF83*. A dehydration-responsive element (DRE; TACCGACAT) and ABA-responsive element (ABRE; ACGTGG/TC) cis-elements were represented.

**Table S1.** Agronomic traits of *OsERF83* overexpression transgenic rice plants grown under normal conditions.

| Genotype   | Plant height (cm) | Culm length (cm) | Panicle length (cm) | No. of panicle /hill | No. of spikelet/ panicle | No. of total spikelet/ hill | Number of filled grains (NFG) | Filling rate (%) | Total grain weight (g) | 1000 grain weight (g) |
|------------|-------------------|------------------|---------------------|----------------------|--------------------------|-----------------------------|-------------------------------|------------------|------------------------|-----------------------|
| NT         | 98.86             | 78.71            | 20.14               | 17.55                | 104.52                   | 1783.90                     | 1507.00                       | 84.95            | 35.75                  | 23.76                 |
| OX-#1      | 75.50             | 59.67            | 15.7                | 14.00                | 82.91                    | 1116.50                     | 841.55                        | 76.56            | 17.35                  | 20.65                 |
| % $\Delta$ | -23.6             | -24.19           | -22.05              | -20.23               | -20.68                   | -37.41                      | -44.16                        | -9.88            | -51.49                 | -13.10                |
| p-value    | 0.000**           | 0.000**          | 0.001**             | 0.006**              | 0.011*                   | 0.000**                     | 0.000**                       | 0.000**          | 0.000**                | 0.000**               |
| OX-#2      | 87.63             | 71.69            | 15.94               | 15.67                | 78.33                    | 1168.50                     | 928.83                        | 78.71            | 19.57                  | 21.09                 |
| % $\Delta$ | -11.4             | -8.92            | -20.86              | -10.73               | -25.06                   | -34.50                      | -38.37                        | -7.34            | -45.25                 | -11.24                |
| p-value    | 0.000**           | 0.006**          | 0.000**             | 0.242                | 0.000**                  | 0.000**                     | 0.000**                       | 0.000**          | 0.000**                | 0.000**               |
| OX-#11     | 81.50             | 63.06            | 18.44               | 18.00                | 84.08                    | 1468.74                     | 1040.74                       | 72.36            | 24.07                  | 23.31                 |
| % $\Delta$ | -17.6             | -19.88           | -8.45               | 2.56                 | -19.56                   | -17.67                      | -30.94                        | -14.82           | -32.68                 | -1.89                 |
| p-value    | 0.000**           | 0.000**          | 0.020*              | 0.743                | 0.014*                   | 0.029*                      | 0.000**                       | 0.000**          | 0.000**                | 0.344                 |

**Table S2.** List of other genes up-regulated (> 2 fold) in *OsERF83-MYC<sup>OX</sup>* compared with NT, following drought treatment in shoots and roots.

| Descriptions                                                          | Gene ID      | OX/NT<br>fc. | OX/NT<br>pval. | GCC box                                                                                                                |
|-----------------------------------------------------------------------|--------------|--------------|----------------|------------------------------------------------------------------------------------------------------------------------|
| <b>Others</b>                                                         |              |              |                |                                                                                                                        |
| OsSNDP6                                                               | Os05g0545000 | 93.56        | 0.000          | -2547                                                                                                                  |
| OsCDC48, PSD128                                                       | Os03g0151800 | 23.44        | 0.000          |                                                                                                                        |
| OsASL1                                                                | Os03g0305500 | 8.59         | 0.001          | -2950, -1607, -1491, -1488, -1365, -1362, -1302, -1158, -941, -328, -317, -234, -231, -214, -181, -178, -175, -27, -24 |
| OsNABP                                                                | Os06g0215200 | 7.42         | 0.018          |                                                                                                                        |
| OsSCP65, CBP1                                                         | Os12g0257000 | 6.16         | 0.034          | -1760, -1493, -1421, -1306, -1260, -1176, -1086, -1083, -1039, -1036, -1002, -975                                      |
| OsRab5B1                                                              | Os03g0666500 | 6.12         | 0.000          |                                                                                                                        |
| OsVLN4                                                                | Os04g0604000 | 5.38         | 0.000          | -1293, -843, -840                                                                                                      |
| OsalphaCA3                                                            | Os08g0423500 | 4.72         | 0.025          | -506, -472, -464, -434                                                                                                 |
| OsPP2C14, OsPP24                                                      | Os02g0471500 | 4.42         | 0.028          | -2409, -156                                                                                                            |
| Glu1, OsEnS-16                                                        | Os01g0762500 | 4.26         | 0.042          |                                                                                                                        |
| OSK28                                                                 | Os07g0625400 | 3.98         | 0.001          | -2892, -2823, -470, -467, -364, -129                                                                                   |
| OsRFP                                                                 | Os03g0326300 | 3.82         | 0.050          |                                                                                                                        |
| OsEnS-40                                                              | Os02g0586900 | 3.74         | 0.003          |                                                                                                                        |
| OsTHI3, OsTHION3                                                      | Os06g0513050 | 3.59         | 0.006          |                                                                                                                        |
| OsEnS-119                                                             | Os08g0286500 | 3.31         | 0.013          |                                                                                                                        |
| OsPGK1                                                                | Os01g0800266 | 3.29         | 0.037          | -201, -192                                                                                                             |
| OsPUP2                                                                | Os09g0467300 | 3.17         | 0.040          |                                                                                                                        |
| OsGSTF5                                                               | Os01g0369700 | 3.15         | 0.001          |                                                                                                                        |
| OsTBL33                                                               | Os12g0516800 | 3.14         | 0.007          | -1155, -1017, -1013                                                                                                    |
| Osppc2a, OSPPC                                                        | Os08g0366000 | 3.09         | 0.017          |                                                                                                                        |
| Tryptophan synthase                                                   | Os08g0135900 | 3.07         | 0.005          |                                                                                                                        |
| OsCatB                                                                | Os05g0310500 | 2.98         | 0.000          | -2294                                                                                                                  |
| Similar to Stearoyl-acyl carrier protein desaturase                   | Os03g0423300 | 2.91         | 0.031          |                                                                                                                        |
| Similar to Oxidoreductase, 2OG-Fe oxygenase family protein, expressed | Os10g0558750 | 2.64         | 0.000          |                                                                                                                        |
| OsPAP27a, OsNPP6                                                      | Os09g0506000 | 2.60         | 0.046          | -2870, -2830, -2827, -1219, -1156, -1153, -1138, -1090, -1087, -1084, -1081                                            |
| OsISC3                                                                | Os09g0270900 | 2.57         | 0.005          | -2951, -2926, -2867, -2864, -2861                                                                                      |
| Similar to ACX4 (ACYL-COA OXIDASE 4); acyl-CoA oxidase/oxidoreductase | Os06g0346300 | 2.56         | 0.026          | -280, -277, -213, -179, -161, -108, -90                                                                                |
| OsSTA16                                                               | Os01g0548000 | 2.49         | 0.035          | -2323                                                                                                                  |
| OsRePRP2.1                                                            | Os07g0418700 | 2.49         | 0.001          | x                                                                                                                      |
| Arf GTPase activating protein family protein                          | Os07g0563800 | 2.48         | 0.000          | -552, -530, -358, -334, -327, -320, -295                                                                               |

|                                                                 |              |      |       |                                              |
|-----------------------------------------------------------------|--------------|------|-------|----------------------------------------------|
| OsPP2A-B"                                                       | Os10g0476600 | 2.46 | 0.011 | -2887, -2836, -2802, -2781, -856, -114, -111 |
| OsTHI5, OsTHION4                                                | Os06g0513862 | 2.33 | 0.043 | -1718, -1715, -1697, -1002, -999             |
| Zinc finger,<br>RING/FYVE/PHD-type<br>domain containing protein | Os06g0717600 | 2.11 | 0.006 | -2908                                        |
| OsCBSCBS3                                                       | Os04g0382300 | 2.07 | 0.000 | -2575, -2572, -2390                          |
| OsaHMT4                                                         | Os12g0607000 | 2.04 | 0.005 |                                              |
| OsODD11, OsM3H                                                  | Os10g0558700 | 2.01 | 0.000 |                                              |

**Table S3.** List of primers used in this study.

| Gene                                                                     | Primer Sequence |                                |                               |
|--------------------------------------------------------------------------|-----------------|--------------------------------|-------------------------------|
|                                                                          | Purpose         | Forward                        | Reverse                       |
| <i>OsERF83</i> (Os03g0860100)                                            | qRT-PCR         | 5'-GACGGATCAGCATCAGGATCA-3'    | 5'-TCCATGGCTGGGACAGAGAC-3'    |
| <i>Ubi</i> (Os06g0681400)                                                | qRT-PCR         | 5'-GCCAAGATCCAGGACAAGGA-3'     | 5'-GCCATCCTCCAGCTGCTT-3'      |
| <i>OsNPF8.10</i> (Os01g0142800)                                          | qRT-PCR         | 5'-TGCTGCCTGTTTCAGTTTCTC -3'   | 5'-CCAAGCATTCCGTCCCTGAT-3'    |
| <i>OsNPF8.17</i> (Os10g0112500)                                          | qRT-PCR         | 5'-GGGATGATCACGCTCACAGT-3'     | 5'-AGGTAGAGCCCCAGGAACAC-3'    |
| <i>OsLHT1</i> (Os08g0127100)                                             | qRT-PCR         | 5'-AAGAAGTTCCACGACGTGCT-3'     | 5'-GTTGAAGTTTGGGAGCTGCG-3'    |
| <i>OsMSL38</i> (Os11g0282700)                                            | qRT-PCR         | 5'-CCTAAACTAAGGTATCGAAGATGC-3' | 5'-ATTCATAGGCCATAACAGTGACC-3' |
| <i>Myb/SANT-like domain domain containing protein.</i><br>(Os08g0496700) | qRT-PCR         | 5'-GGGCTAAATTCATTAACGTCCCC-3'  | 5'-TCAACATCACCAGGACTGCC-3'    |
| <i>OsMYB</i> (Os01g0298400)                                              | qRT-PCR         | 5'-ACGAACCACCACCTGATGAC-3'     | 5'-AACTGATCCCAACGCTCGTG-3'    |
| <i>OsTPS3</i> (Os02g0121700)                                             | qRT-PCR         | 5'-ATGGCGAATTCAGGCTCGAT-3'     | 5'-TGCAAGATTGGCTCGAGGT-3'     |
| <i>OsCPS4</i> (Os04g0178300)                                             | qRT-PCR         | 5'-GGGTTCTACAATTAATGTTCCGGT-3' | 5'-ACAGACAGCATGCACTGTCA-3'    |
| <i>OsLAC17</i> (Os10g0346300)                                            | qRT-PCR         | 5'-ACCCAGGGGCATGGTTAATG-3'     | 5'-TCATGGCCTTCCGTCCTAGA-3'    |
| <i>OsLAC10</i> (Os02g0749700)                                            | qRT-PCR         | 5'-CAGCTTACGGCACTAGTTAGC-3'    | 5'-CCACGCCTGCTAGTAACCAA-3'    |
| <i>CAD8D</i> (Os09g0400400)                                              | qRT-PCR         | 5'-GCTTAGCAAGGAGTGGTCGAT-3'    | 5'-TGATGATGTGCAGGTCGGT-3'     |
| <i>OsSAP</i> (Os09g0425900)                                              | qRT-PCR         | 5'-GGGATCGGACCCAGTTCTTC-3'     | 5'-GACTGGCAGTTGTAGCACAG-3'    |
| <i>Similar to Sorting nexin 1</i><br>(Os01g0862300)                      | qRT-PCR         | 5'-AAAAATAATTCGGGCAGGATCTC-3'  | 5'-GGCTCAGTTGAACCTCCCAA-3'    |
| <i>PCC13-62</i> (Os04g0404400)                                           | qRT-PCR         | 5'-TGCTACCAAGAAGTCGGCCA-3'     | 5'-GCTGTTCTCGTAGGGGTTGAA-3'   |
| <i>OsOPR4</i> (Os06g0215900)                                             | qRT-PCR         | 5'-CCTACGGGAGGCACTTCTTG-3'     | 5'-CATAAGTAGCAGCGCCCTCG-3'    |
| <i>OsERF83</i> (Os03g0860100)                                            | CDS             | 5'-GCATTGCTGCATGTCGCTTC-3'     | 5'-GCTGTTGGTGGTGCTCATGG-3'    |

## **Reference**

**Nakano T, Suzuki K, Fujimura T, Shinshi H.** 2006. Genome-Wide Analysis of the ERF Gene Family in Arabidopsis and Rice. *Plant Physiology* **140**, 411-432.
